# Supplementary material
Source: PubMed Central journal article supplement (PMC3641580)

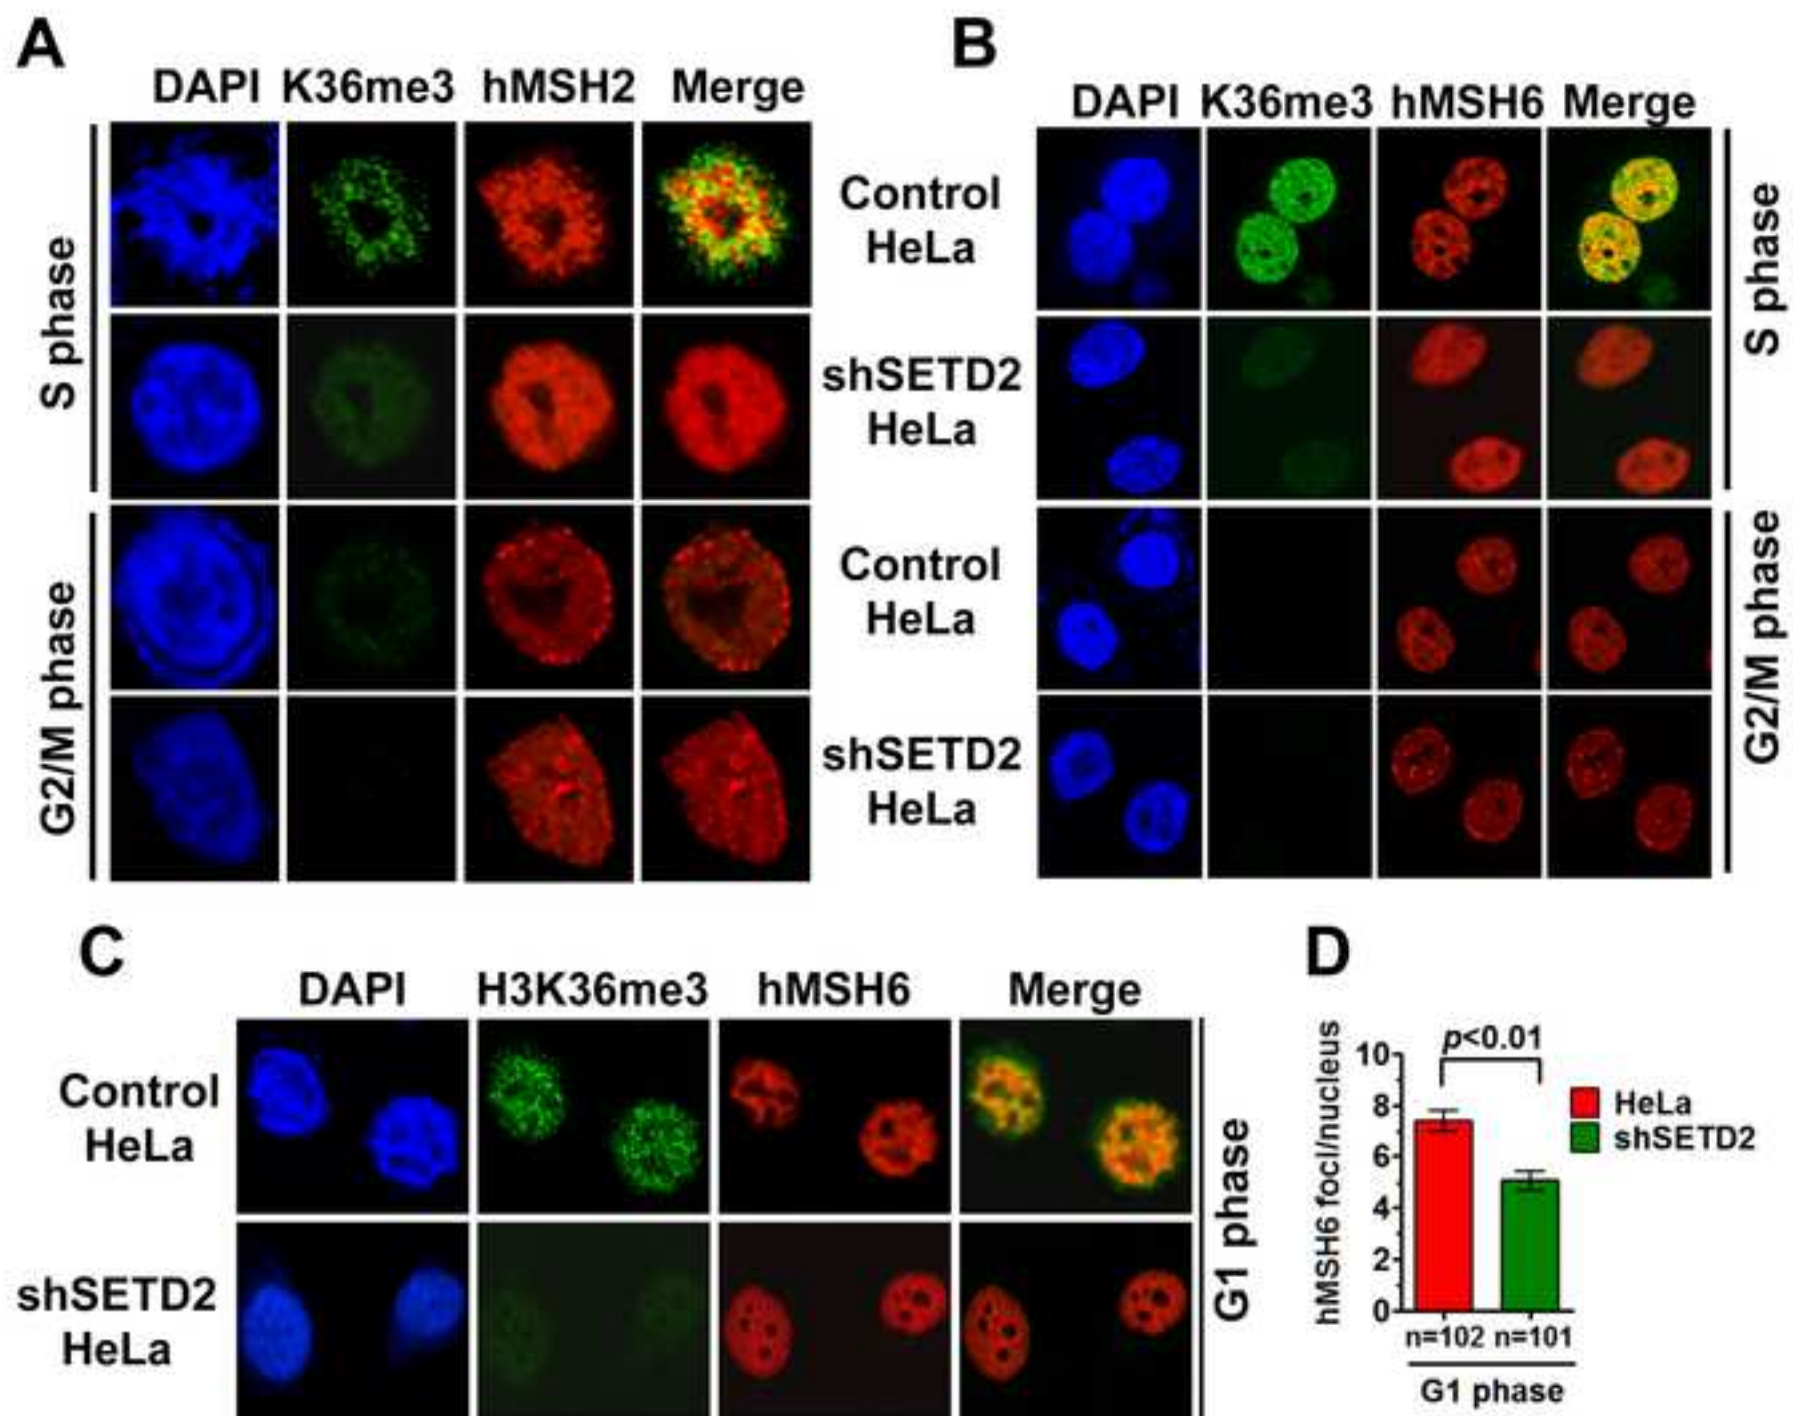

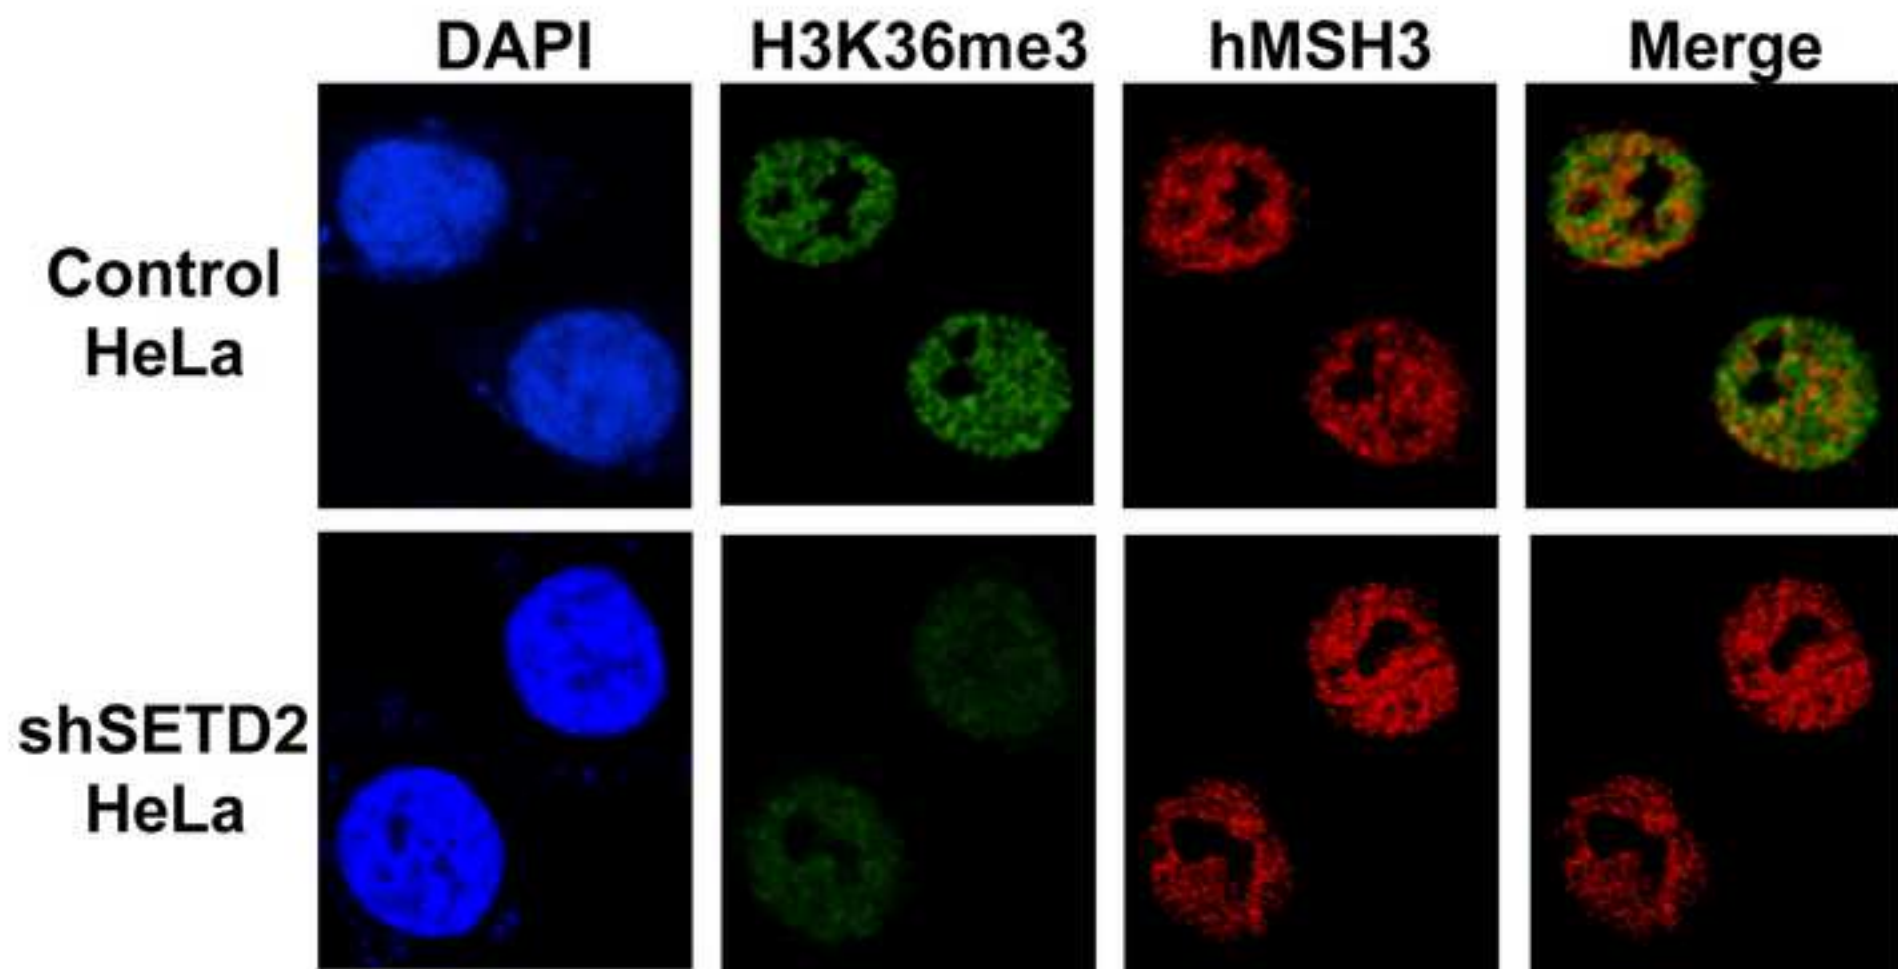





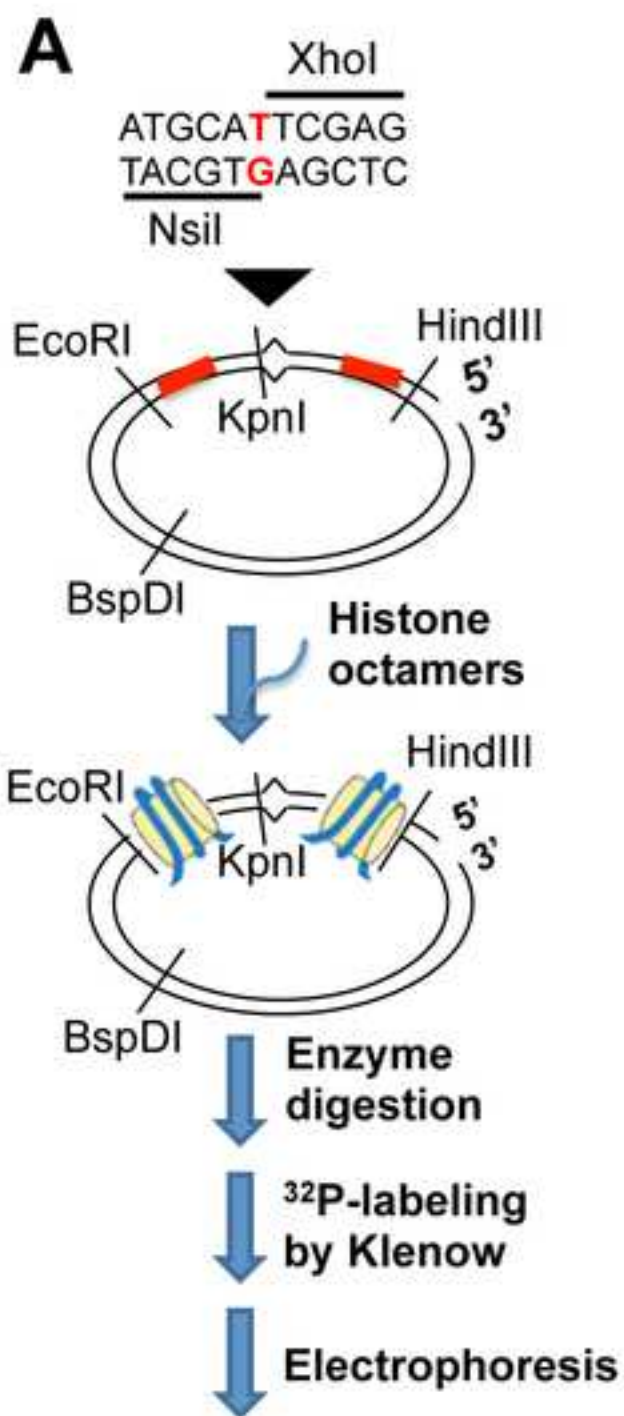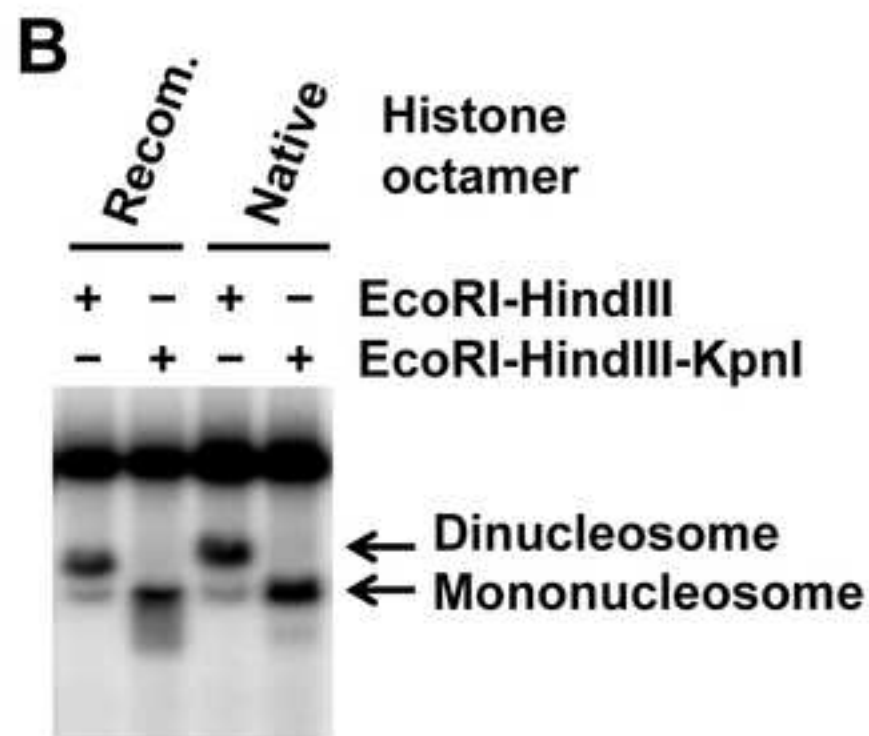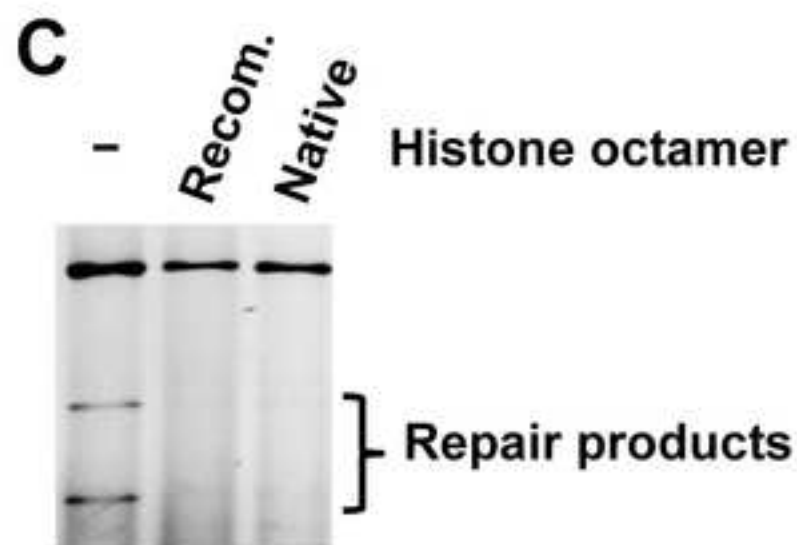

Supplement: NIHMS460340-supplement-02.pdf [file NIHMS460340-supplement-02.pdf]
